# Supplementary material for: TNFRSF receptor-specific antibody fusion proteins with targeting controlled FcγR-independent agonistic activity
Source: PubMed Central journal article supplement (PMC6399339; doi:10.1038/s41419-019-1456-x), 2019-03-04
Supplement: 41419_2019_1456_MOESM2_ESM.pdf [file 41419_2019_1456_MOESM2_ESM.pdf]

**Supplemental table I.** TNFRSF receptor-specific antibodies evaluated in this study

| Antigen | Isotype | Clone               | Function                         | Applications                 | Company                     | Order-no.   |
|---------|---------|---------------------|----------------------------------|------------------------------|-----------------------------|-------------|
| 4-1BB   | mIgG1   | 4B4-1               |                                  | FACS                         | BD Pharmingen <sup>TM</sup> | 555956      |
| CD27    | mIgG1   | 57703               | neutralization                   | FACS, WB                     | R&D Systems                 | MAB382      |
| CD40    | IgG1    | G28.5 <sup>a</sup>  |                                  |                              |                             |             |
| CD40    | mIgG1   | HB14                |                                  | FACS                         | Milteny Biotec              | 130-099-385 |
| CD40    | mIgG2A  | LOB-11              |                                  | FACS , IF, IHC, IP, WB       | Santa Cruz                  | sc-13528    |
| CD95    | IgG1    | E09 <sup>a</sup>    |                                  | FACS                         |                             |             |
| CD95    | mIgG1   | DX2                 |                                  | IHC, WB                      | R&D Systems                 | MAB142      |
| Fn14    | hIgG1   | 18D1 <sup>c</sup>   | blocking                         |                              |                             |             |
| Fn14    | mIgG2B  | ITEM-4              | neutralization                   | FACS, IF, WB                 | Invitrogen                  | 12-9018-42  |
| Fn14    | hIgG1   | P4A8 <sup>d</sup>   | blocking                         |                              |                             |             |
| Fn14    | hIgG1   | PDL192 <sup>e</sup> |                                  |                              |                             |             |
| GITR    | mIgG1   | DT5D3               |                                  | FACS                         | Milteny Biotec              | 130-099-088 |
| LTβR    | mIgG2B  | 31G4D8              | agonist                          | ELISA , FACS, IP, WB,        | Novusbio                    | NB100-78050 |
| LTβR    | mIgG1   | 71315               | agonist                          | n.m.                         | R&D Systems                 | MAB6291     |
| LTβR    | mIgG1   | 71319               |                                  | FACS , WB                    | R&D Systems                 | MAB629      |
| LTβR    | IgG1    | BHA10 <sup>f</sup>  |                                  |                              |                             |             |
| Ox40    | mIgG1   | BER-Act35           |                                  | FACS,IF, IHC, IF, WB         | Santa Cruz                  | sc-20073    |
| TNFR1   | mIgG1   | 16803               | neutralization                   | FACS, WB                     | R&D Systems                 | MAB225      |
| TNFR1   | mIgG1   | MABTNFR1-A1         |                                  | ELISA (capture)              | BD Pharmingen <sup>TM</sup> | 552535      |
| TNFR1   | mIgG2A  | H398 <sup>g</sup>   | blocking                         |                              |                             |             |
| TNFR1   | mIgG1   | htr9                | agonist,<br>inhibits TNF-binding | FACS, IHC, WB                | Acris                       | BM4053      |
| TNFR2   | mIgG2A  | 22235               |                                  | FACS                         | R&D Systems                 | FAB226P     |
| TNFR2   | mIgG1   | MR2-1               |                                  | FACS , IHC, IP, WB           | LSBio                       | LS-C139940  |
| TNFR2   | mIgG1   | utr1                | blocking                         | FACS , IHC, IP, WB           | Acris                       | BM4054      |
| TNFR2   |         |                     |                                  | ELISA (capture) <sup>h</sup> | R&D Systems                 |             |
| TRAILR1 | mIgG1   | DJR1                |                                  | FACS, IF                     | Biologend ®                 | 307202      |
| TRAILR1 | mIgG1   | HS101               | inhibition                       | FACS, ICC, IP                | AdipoGen ®                  | AG-20B-0022 |
| TRAILR2 | mIgG1   | D-6                 |                                  | ELISA , IF, IP, WB           | Santa Cruz                  | sc-166624   |
| TRAILR2 | mIgG1   | DJR2-2              |                                  | FACS , IF                    | Biologend ®                 | 307302      |

<sup>a</sup> AJ853736 (PDB entry)

<sup>b</sup> 3TJE\_H+L (PDB entry)

<sup>c</sup> sequence on request by Argenx

<sup>d</sup> Garber E, Burkly L, Michealson J, Lugovskoy A, Hsu YM, Hanf K. Anti-Fn14 antibodies and uses thereof. WO2009140177A2. 2009

<sup>e</sup> Culp P. Therapeutic use of anti-TWEAK antibodies. WO2009020933A2. 2009

<sup>f</sup> Michaelson et al., 2009 [1]

<sup>g</sup> kind gift of Klaus Pfizenmaier

<sup>h</sup> no additional information available

**Supplemental table II.** Primary structure of antibody chains used in this study

|      | <b>CONSTRUCT</b>                       | <b>ARCHITECTURE</b>                                                              |
|------|----------------------------------------|----------------------------------------------------------------------------------|
| [1]  | α4-1BB(HBBK4)-LC                       | $L^a - F^b - V_L$ (US 2009/0041763 A1_H4B4-L) – $C_L^c$                          |
| [2]  | α4-1BB(HBBK4)-IgG1(N297A)-HC-scFv:CD20 | $L^a - F^b - V_H$ (US 2009/0041763 A1_H4B4-H) – $C_H^d$ – scFv:CD20 <sup>f</sup> |
| [3]  | αCD40(G28.5)-LC                        | $L^a - F^b - V_L$ (aa: 148-259 [AAB81500.1]) – $C_L^c$                           |
| [4]  | αCD40(G28.5)-IgG1-HC                   | $L^a - F^b - V_H$ (aa: 21-132 [CAH69220.1]) – $C_H^d$                            |
| [5]  | αCD40(G28.5)-IgG1(N297A)-HC-scFv:CD20  | $L^a - F^b - V_H$ (aa: 21-132 [CAH69220.1]) – $C_H^e$ – scFv:CD20 <sup>f</sup>   |
| [6]  | αCD95(E09)-LC                          | $L^a - F^b - V_L$ (aa: 1-111 [3TJE_L]) – $C_L^c$                                 |
| [7]  | αCD95(E09)-IgG1-HC                     | $L^a - F^b - V_H$ (aa: 1-132 [3TJE_H]) – $C_H^d$                                 |
| [8]  | αCD95(E09)-IgG1(N297A)-HC-scFv:CD20    | $L^a - F^b - V_H$ (aa: 1-132 [3TJE_H]) – $C_H^e$ – scFv:CD20 <sup>f</sup>        |
| [9]  | αFn14(18D1)-LC                         | $L^a - F^b - V_L^h - C_L^c$                                                      |
| [10] | αFn14(18D1)-LC (murin)                 | $L^a - F^b - V_L^h - C_L$ (aa: 3-111 [WP_077942483.1])                           |
| [11] | αFn14(18D1)-LC-GpL                     | $L^a - F^b - V_L^h - C_L^c - GpL$ (aa: 63-230 [AEX33289.1])                      |
| [12] | αFn14(18D1)-IgG1-HC                    | $L^a - F^b - V_H^h - C_H^d$                                                      |
| [13] | αFn14(18D1)-IgG2-HC                    | $L^a - V_H^h - C_H$ (aa: 137-464 [BAC85395.1])                                   |
| [14] | αFn14(18D1)-IgG3-HC                    | $L^a - V_H^h - C_H$ (aa: 141-519 [AAH89421.1])                                   |
| [15] | αFn14(18D1)-IgG4-HC                    | $L^a - V_H^h - C_H$ (aa: 118-446 [ASY91977.1])                                   |
| [16] | αFn14(18D1)-mIgG1-HC                   | $L^a - V_H^h - C_H$ (aa: 135-460 [BAQ25543.1])                                   |
| [18] | αFn14(18D1)-mIgG2A-HC                  | $L^a - V_H^h - C_H$ (aa: 136-467 [4WEB_H])                                       |
| [19] | αFn14(18D1)-IgG1(N297A)-HC             | $L^a - F^b - V_H^h - C_H^e$                                                      |
| [20] | αFn14(18D1)-Fab1-HC-scFv:CD20          | $L^a - V_H^h - C_H$ (aa: 117-232 [4OQT_H]) – scFv:CD20 <sup>f</sup>              |
| [21] | αFn14(18D1)-IgG1(N297A)-HC-scFv:CD20   | $L^a - F^b - V_H^h - C_H^e - scFv:CD20^f$                                        |
| [22] | αFn14(18D1)-IgG2-HC-scFv:CD20          | $L^a - V_H^h - C_H$ (aa: 137-464 [BAC85395.1]) – scFv:CD20 <sup>f</sup>          |
| [23] | αFn14(18D1)-IgG3-HC-scFv:CD20          | $L^a - V_H^h - C_H$ (aa: 141-519 [AAH89421.1]) – scFv:CD20 <sup>f</sup>          |
| [24] | αFn14(18D1)-IgG4-HC-scFv:CD20          | $L^a - V_H^h - C_H$ (aa: 118-446 [ASY91977.1]) – scFv:CD20 <sup>f</sup>          |
| [26] | αFn14(P4A8)-LC                         | $L^a - F^b - V_L$ (aa: 311-421 [AIL25364.1]) – $C_L^c$                           |
| [27] | αFn14(P4A8)-IgG1-HC                    | $L^a - F^b - V_H$ (aa: 437-557 [AIL25364.1]) – $C_H^d$                           |
| [28] | αFn14(PDL192)-LC                       | $L^a - F^b - V_L$ (WO 2013/177386 AI_PDL192 $V_L$ ) – $C_L^c$                    |
| [29] | αFn14(PDL192)-IgG1-HC                  | $L^a - F^b - V_H$ (WO 2013/177386 AI_PDL192 $V_H$ ) – $C_H^d$                    |
| [30] | αLTβR(BHA-10)-LC                       | $L^a - F^b - V_L$ (aa: 1-107 [1]) – $C_L^c$                                      |
| [31] | αLTβR(BHA-10)-IgG1-HC                  | $L^a - F^b - V_H$ (aa: 1-113 [1]) – $C_H^d$                                      |
| [32] | αTNFR2(C4)-LC                          | $L^a - F^b - V_L^i - C_L^c$                                                      |

|      |                                                |                                                                                                                   |
|------|------------------------------------------------|-------------------------------------------------------------------------------------------------------------------|
| [33] | $\alpha$ TNFR2(C4)-LC (murin)                  | $L^a - F^b - V_L^i - C_L$ (aa: 2-111 [WP_077942483.1])                                                            |
| [34] | $\alpha$ TNFR2(C4)-IgG1-HC                     | $L^a - V_H^j - C_H^d$                                                                                             |
| [35] | $\alpha$ TNFR2(C4)-IgG2-HC                     | $L^a - V_H^j - C_H$ (aa: 137-464 [BAC85395.1])                                                                    |
| [36] | $\alpha$ TNFR2(C4)-IgG3-HC                     | $L^a - V_H^j - C_H$ (aa: 141-519 [AAH89421.1])                                                                    |
| [37] | $\alpha$ TNFR2(C4)-IgG4-HC                     | $L^a - V_H^j - C_H$ (aa: 118-446 [ASY91977.1])                                                                    |
| [38] | $\alpha$ TNFR2(C4)-mIgG1-HC                    | $L^a - V_H^j - C_H$ (aa: 137-460 [BAQ25543.1])                                                                    |
| [39] | $\alpha$ TNFR2(C4)-mIgG2A-HC                   | $L^a - V_H^j - SSA - C_H$ (aa: 136-467 [4WEB_H])                                                                  |
| [40] | $\alpha$ TNFR2(C4)-IgG1(N297A)-HC-muGITRL      | $L^a - V_H^j - C_H^e - \text{muGITRL}$ (aa: 50-177 [EDL39313.1])                                                  |
| [41] | $\alpha$ TNFR2(C4)-IgG1(N297A)-HC-muIL2        | $L^a - V_H^j - C_H^e - \text{PGT} - \text{muIL2}$ (aa: 21-169 [AAA39281.1])                                       |
| [42] | $\alpha$ TNFR2(C4)-IgG1(N297A)-HC-scFv:CD19    | $L^a - V_H^j - C_H^e - \text{scFv:CD19}^{k[2]}$                                                                   |
| [43] | $\alpha$ TNFR2(C4)-IgG1(N297A)-HC-scFv:CD20    | $L^a - V_H^j - C_H^e - \text{scFv:CD20}^f$                                                                        |
| [44] | $\alpha$ TNFR2(C4)-IgG1(N297A)-HC-scFv:CD70    | $L^a - V_H^j - C_H^e - V_H$ (US20090028872A1_2H5-VH) - $LK^g - V_L$ (US20090028872A1_2H5-VK)                      |
| [45] | $\alpha$ TNFR2(C4)-IgG1(N297A)-HC-scGITRL      | $L^a - V_H^j - C_H^e - \text{GGGSG} - \text{GITRL}^l - LK^g - \text{GITRL}^l - LK^g - \text{QF} - \text{GITRL}^l$ |
| [46] | $\alpha$ TNFR2(C4)-IgG1(N297A)-HC-sc(mu)4-1BBL | $L^a - V_H^j - C_H^e - \text{GGGSG} - \text{mu4-1BBL}^m - LK^g - \text{mu4-1BBL}^m - LK^g - \text{mu4-1BBL}^m$    |

<sup>a</sup> L = Leader: MNFGSLIFLVLVKGQCEVKLVPR

<sup>b</sup> F = Flag: DYKDDDDK

<sup>c</sup>  $C_L$  = constant light (aa: 105-214 [BAA97671.1])

<sup>d</sup>  $C_H$  = constant heavy IgG1 (aa: 145-476 [AAA02914.1])

<sup>e</sup> IgG1(N297A): with A to N mutation at position 327 of constant heavy IgG1 <sup>d</sup>

<sup>f</sup> scFv:CD20 (aa: 38-280 [AUI40871.1]):  $V_H$  (Rituximab) -  $LK^g - V_L$  (Rituximab)

<sup>g</sup> LK = Linker GGGGSGGGGSGGGGS

<sup>h</sup> sequence on request by Argenx

<sup>i</sup>  $V_L$ -C4: DIVMTQSHKFMSTSVGDRVSITCKASQDVDTAVAWYQQKPGQSPKLLIYWASTRHTGVPDRFTGSGSGTDYTLTISSVQAEDLARYYCQQYYSPPTFGGGTKL

<sup>j</sup>  $V_H$ -C4: QVQLLQSGPELVKPGASVKLSCKASGYSFTSYDINWVVKRPGQGLEWVWGIYPRDGTKYNEKFKGKAILTVDTSNTAYMNLHSLTSEDSAVYFCARLTGPIWYFDVWGTGTTVTVSS

<sup>k</sup> kind gift of Prof. Helfrich (University of Groningen)

<sup>l</sup> GITRL (aa: 50-177 [AAD22634.1])

<sup>m</sup> mu4-1BBL (aa: 105-309 [NP\_033430.1])

1. Michaelson JS, Demarest SJ, Miller B, Amatucci A, Snyder WB, Wu X, et al. Anti-tumor activity of stability-engineered IgG-like bispecific antibodies targeting TRAIL-R2 and LTbetaR. *MAbs*. 2009;1:128-41.
2. Stieglmaier J, Bremer E, Kellner C, Liebig TM, ten Cate B, Peipp M, et al. Selective induction of apoptosis in leukemic B-lymphoid cells by a CD19-specific TRAIL fusion protein. *Cancer immunology, immunotherapy : CII*. 2008;57:233-46.
